# Supplementary material for: Constraining models of dominance for nonsynonymous mutations in the human genome
Source: PubMed Central journal article supplement (PMC11446423; doi:10.1371/journal.pgen.1011198), 2024-09-20

**All models, n = 4096**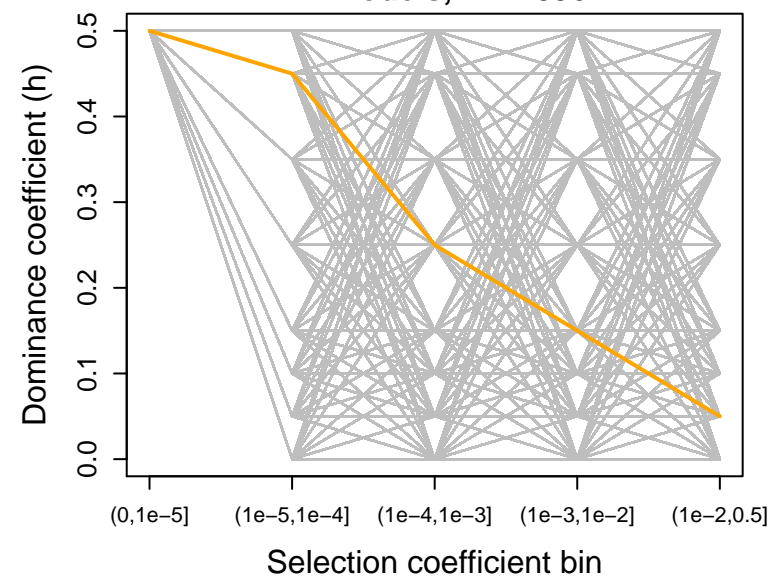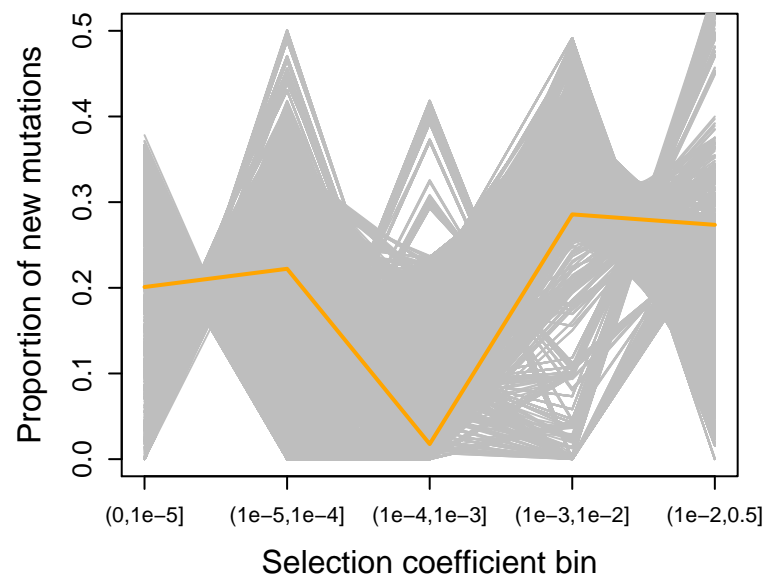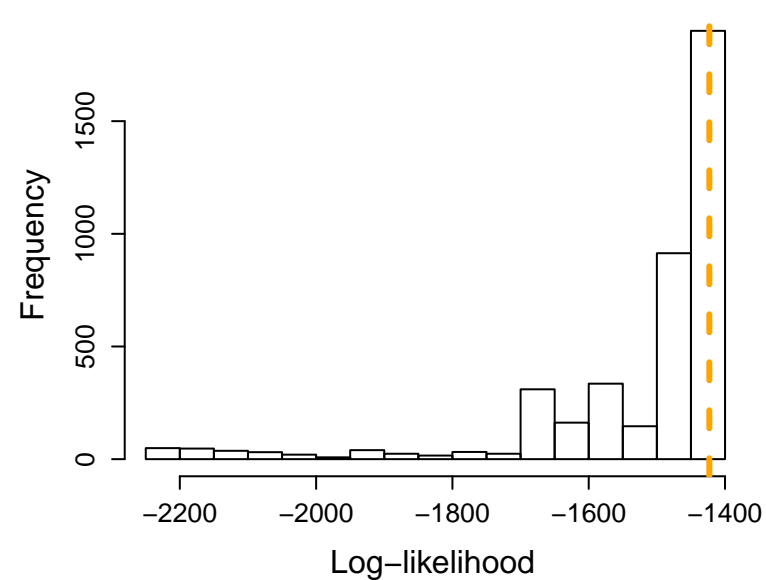**Models 4.74 LL away from MLE, n = 561**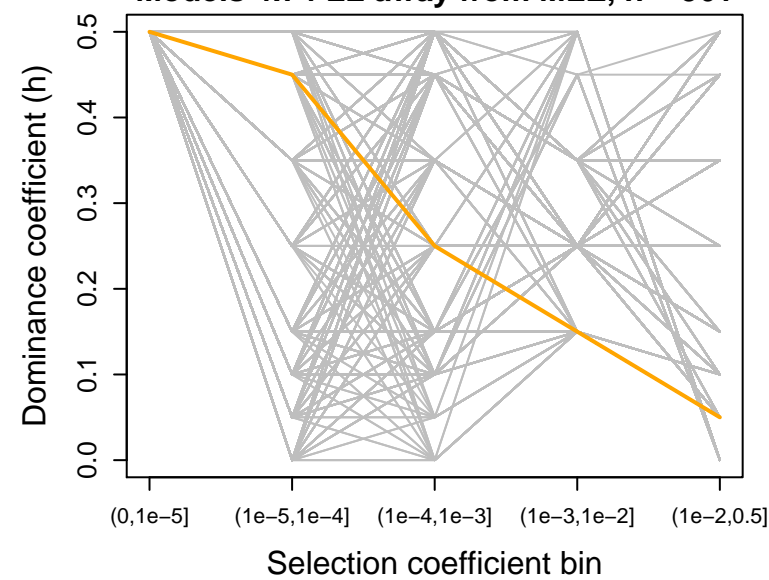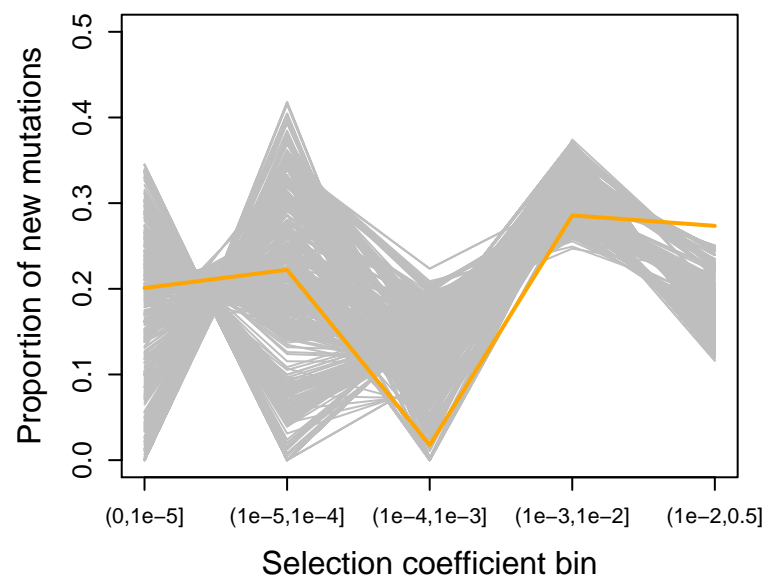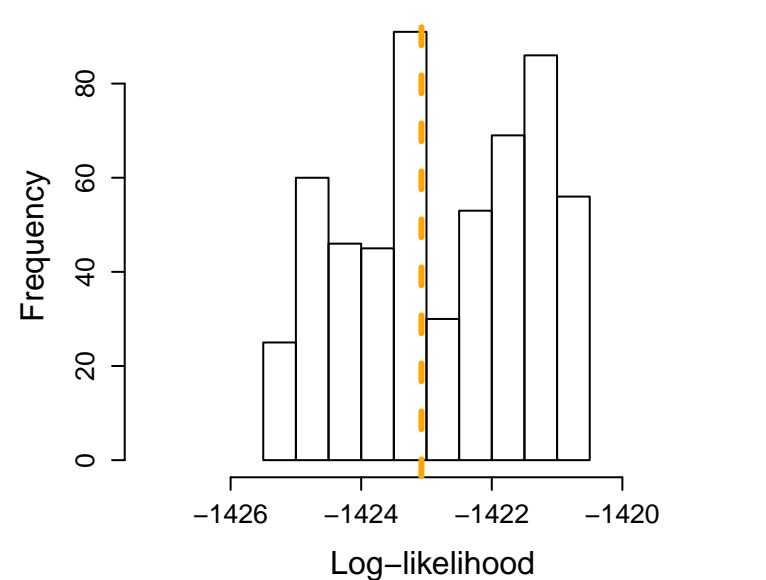**Models with monotonic decay of h, n = 55**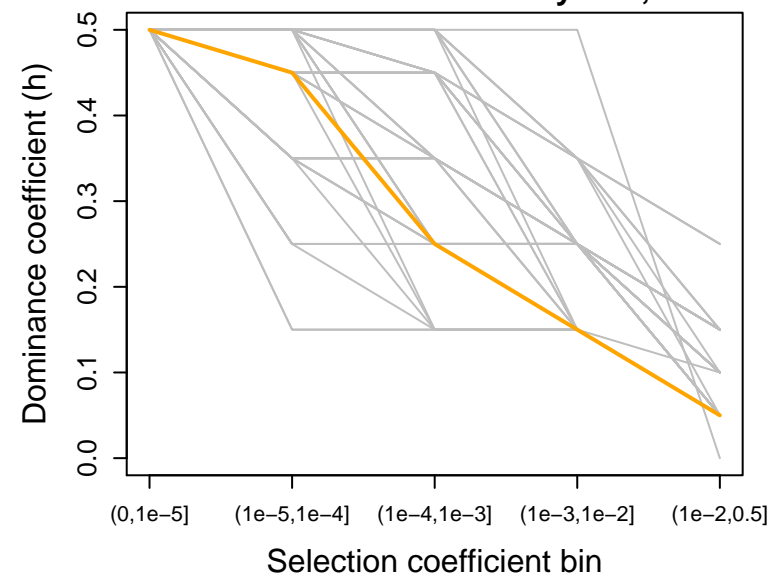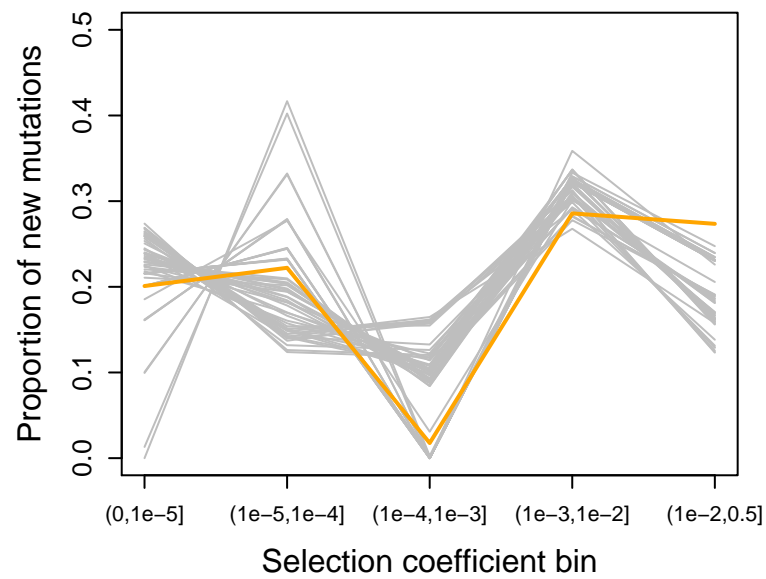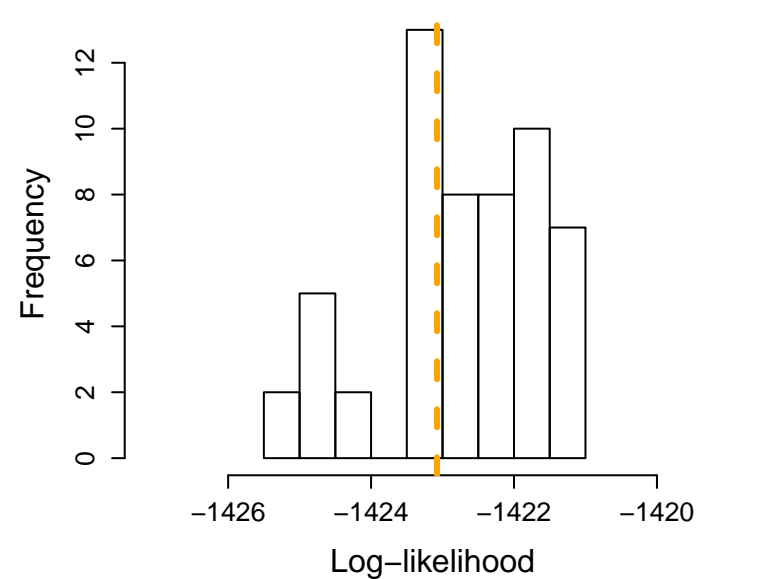

Supplement: pgen.1011198.s010.pdf [file pgen.1011198.s010.pdf]
