# Supplementary material for: Constraining models of dominance for nonsynonymous mutations in the human genome
Source: PubMed Central journal article supplement (PMC11446423; doi:10.1371/journal.pgen.1011198), 2024-09-20

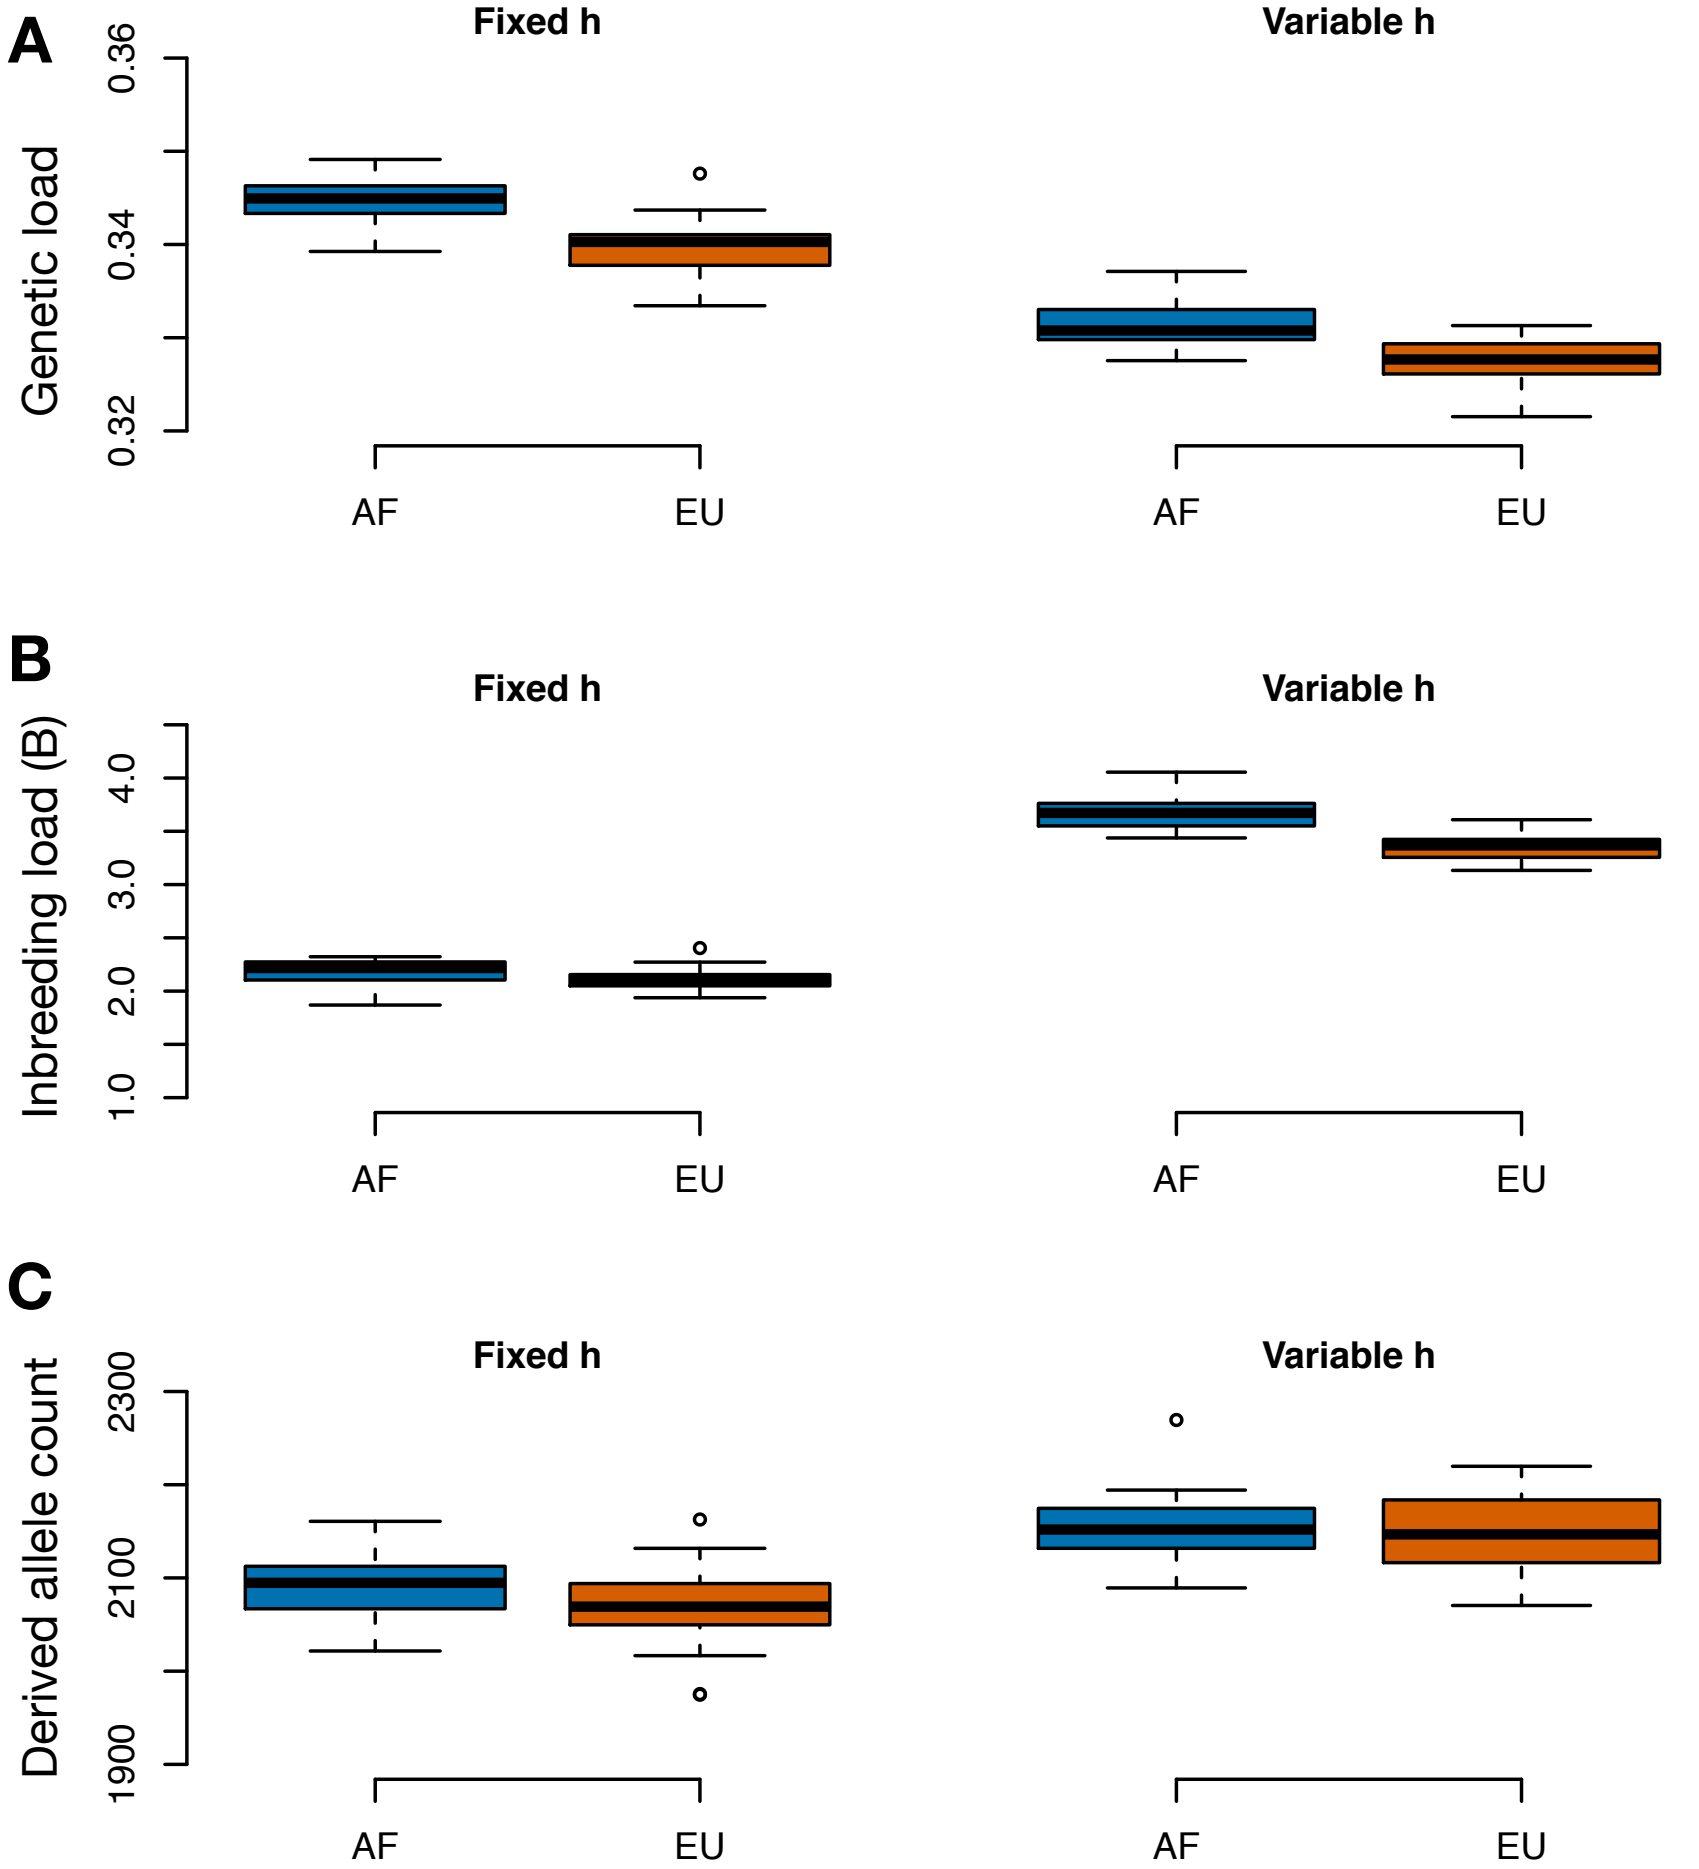

Supplement: pgen.1011198.s013.pdf [file pgen.1011198.s013.pdf]
